# Supplementary material
Source: PubMed Central journal article supplement (PMC2585389)

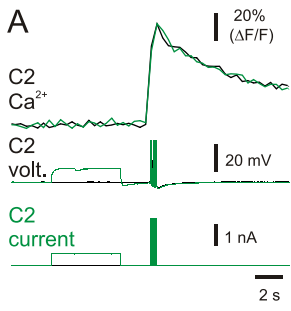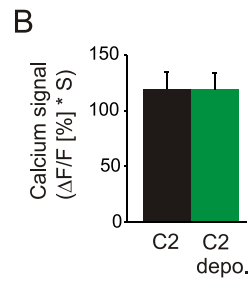

Supplement: 90979.2008_1.pdf [file 90979.2008_1.pdf]

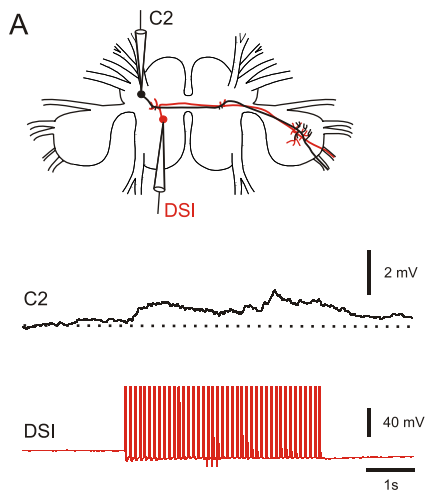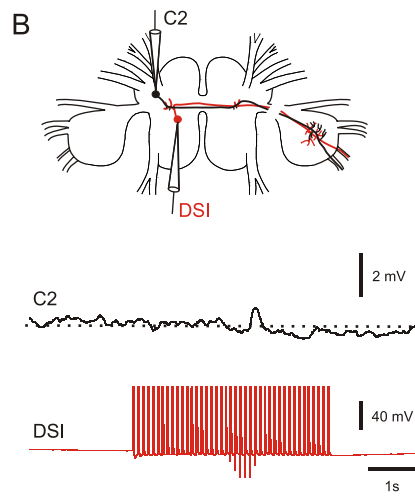

Supplement: 90979.2008_2.pdf [file 90979.2008_2.pdf]
